# Supplementary material for: A Smartphone Integrated Platform for Ratiometric Fluorescent Sensitive and Selective Determination of Dipicolinic Acid
Source: MDPI journal article supplement (doi:10.3390/bios12080668), 2022-08-22
Supplement: s1 [file s1]

Supplementary

# A Smartphone Integrated Platform for Ratiometric Fluorescent Sensitive and Selectivity Determination of DPA

Xiang Li <sup>1,\*</sup>, Junsong Wu <sup>2</sup>, Huaguang Hu <sup>1</sup>, Fangfang Liu <sup>1</sup> and Jialian Wang <sup>1,\*</sup>

<sup>1</sup> School of Marine and Biological Engineering, Yancheng Teachers University (YCTU), Jiangsu, China.

<sup>2</sup> Department of Basic Medical Science, Jiangsu Vocational College of Medicine, Yancheng, Jiangsu, China, 224005, China.

\* Correspondence: Lix01@yctu.edu.cn (X. L.); jlw0901@163.com (J. L.)

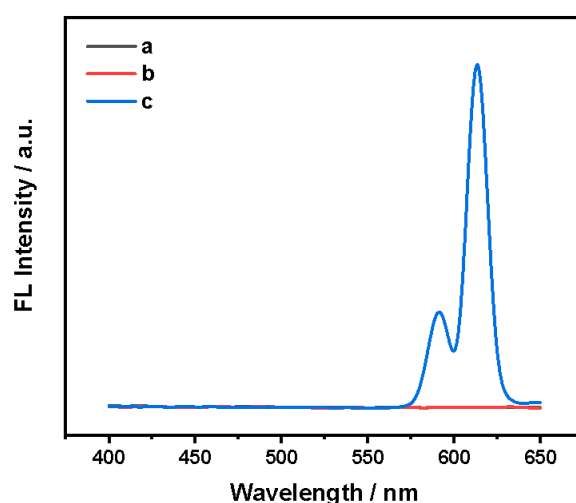

**Figure S1.** The fluorescence spectra of (a)  $\text{Eu}^{3+}$ , (b) DPA, and (c)  $\text{Eu}^{3+}$ /DPA.
